# Supplementary material
Source: HighWire-hosted journal article supplement (https://jech.bmj.com/content/jech-2024-222654)
Supplement: inline-supplementary-material-3 [file inline-supplementary-material-3.pdf]

Supplement 3. Data extraction form generated in Covidence

Supplementary material for Jordão, M., Gong, L., Andre, D., Akhtar, A., Nwofe, E., Hawkins, R., Best, K., Parveen, S., Windle, K., & Clegg, A.  
Minoritised ethnic groups and modifiable dementia risk: a scoping review of UK-based evidence

General information

Study ID

Please create study ID by using the surname of the first author, year of publication and the initials of the publication (e.g., journal)

First author surname

Year of publication

Title

Title of paper / abstract / report that data are extracted from

Type of publication

1.

Governmental report
2.

Peer reviewed journal
3.

NGO report
4.

Thesis
5.

Other

Study funding sources

If this is not mentioned please write NM

Possible conflicts of interest for study authors

If this is not mentioned please write NM

Characteristics of included studies

General Methods

Aim of study

Please described the aim of the study

Study design

1.

Randomised controlled trial
2.

Non-randomised experimental study
3.

Cohort study
4.

Cross sectional study
5.

Case control study
6.

Systematic review
7.

Case series
8.

Case report
9.

Economic evaluation
10.

Other

Data source

Was the study based on primary or secondary data?

1.

Primary
2.

Secondary
3.

Both

If secondary data was used, specify the database

If secondary data is used, please specify. If not, write NA (Not applicable)

When was the data collected?

If this is not mentioned please write NM

Study region

Where in the UK did this study took place?

- 1. All 4 UK nations
- 2. Scotland
- 3. Wales
- 4. England
- 5. Northern Ireland
- 6. Not mentioned
- 7. Other

Study specific location

If the study took place in a specific region (e.g., London, North of England), please specify. If not, please write NA (Not applicable)

Ethnicity measure

Please provide additional details about the ethnicity measure (e.g., which list of categories was used, other criteria used to define ethnicity, like country of birth, etc.)

- 1. Self-report according to UK census categories
- 2. Self-report according to categories designed by researchers
- 3. Self-report without pre-listed categories
- 4. Attributed by researchers
- 5. Other

Ethnicity measure specify

Quote details of the ethnic measure, e.g., were the categories of the census presented to the participants.

Dementia outcome measure

- 1. Cognitive function test
- 2. Dementia diagnosis
- 3. Other

Dementia outcome measure specify

Quote details of the dementia risk measure, e.g., cognitive function tests, or diagnostic criteria for dementia used. If more than one outcome measure related to dementia risk is used, please include all of those described.

Participants

Sample characteristics

Was the sample drawn from the general population or a specific subgroup (e.g., specific condition)?

1.

General population
2.

Specific subgroup

Sample subgroup

If the sample includes only a specific subgroup of people (e.g., specific condition) please specify which.  
If the sample is drawn from the general population write NA

Inclusion criteria

If this is not mentioned please write NM

Exclusion criteria

If this is not mentioned please write NM

Age inclusion criteria

Recruitment methods

1.

Community organisations
2.

NHS services
3.

Existing cohort
4.

Medical records
5.

Non-medical records
6.

Door to door
7.

Media advertisement
8.

Other

Total number of participants

If this is not mentioned please write NM

Mean age of the participants

If this is not mentioned please write NM

Median age of participants

If this is not mentioned please write NM

SD age of the participants

If this is not mentioned please write NM

Age range of the participants

If this is not mentioned please write NM

Which ethnic minority groups have been studied?

Please select the options as described by the authors

1.

Black British
2.

Asian British
3.

Asian
4.

Mixed
5.

Black Caribbean/African-Caribbean
6.

South Asian
7.

East Asian
8.

White Irish
9.

Black African
10.

African
11.

African or Caribbean
12.

Black
13.

Unknown
14.

Non-white
15.

UK-born
16.

Other

Has a majority white/caucasian group been included?

1.

Yes
2.

No

Have ethnic groups been compared?

1.

Yes
2.

No

If ethnic groups have been compared, please specify which

Baseline Population Characteristics

Extract for included groups. If the study includes groups not listed, please add relevant category to the data extraction sheet.

|                        | Black | South Asian | Caucasian / White | White Irish | Black African | Black Caribbean/African-Caribbean | Asian | Mixed | African or Caribbean | Other | Unknown | Non-White | UK-born | Other White |
|------------------------|-------|-------------|-------------------|-------------|---------------|-----------------------------------|-------|-------|----------------------|-------|---------|-----------|---------|-------------|
| Age range              |       |             |                   |             |               |                                   |       |       |                      |       |         |           |         |             |
| Age mean               |       |             |                   |             |               |                                   |       |       |                      |       |         |           |         |             |
| Age median             |       |             |                   |             |               |                                   |       |       |                      |       |         |           |         |             |
| Age SD                 |       |             |                   |             |               |                                   |       |       |                      |       |         |           |         |             |
| Number of participants |       |             |                   |             |               |                                   |       |       |                      |       |         |           |         |             |
| Education level mean   |       |             |                   |             |               |                                   |       |       |                      |       |         |           |         |             |
| Education level SD     |       |             |                   |             |               |                                   |       |       |                      |       |         |           |         |             |

Analysis

MDF risk factors measured as predictors

Please select all that apply

1. less education
2. hypertension
3. hearing impairment
4. smoking

- 5. obesity
- 6. depression
- 7. physical inactivity
- 8. diabetes
- 9. low social contact
- 10. alcohol consumption
- 11. traumatic brain injury
- 12. air pollution
- 13. none of the above

MDF risk factors controlled for but not used as predictors

Please select all that apply

- 1. less education
- 2. hypertension
- 3. hearing impairment
- 4. smoking
- 5. obesity
- 6. depression
- 7. physical inactivity
- 8. diabetes
- 9. low social contact
- 10. alcohol consumption
- 11. traumatic brain injury
- 12. air pollution
- 13. none of the above

Other risk factors suggested by PPI

Were any of the following risk factors suggested by PPI included in the analysis (predictors or controlled variables)?

- 1. sleep
- 2. diet
- 3. housing
- 4. sound pollution
- 5. low income
- 6. deprivation

7. racism/discrimination
8. visual impairment
9. smelling impairment
10. none of the above

Risk factors measures

Please specify how each risk factor variable was measured if available (e.g., hypertension identified based in antihypertensive prescription)  
Add Unspecified for risk factors which were analysed but don't mention how the risk factor was measured.

|                        | Measured based on... |
|------------------------|----------------------|
| less education         |                      |
| hypertension           |                      |
| hearing impairment     |                      |
| smoking                |                      |
| obesity                |                      |
| depression             |                      |
| physical inactivity    |                      |
| diabetes               |                      |
| low social contact     |                      |
| alcohol consumption    |                      |
| traumatic brain injury |                      |
| air pollution          |                      |

Statistical analysis/model

Please select the type of statistical analysis used

1.
2.
3.

Interactions between risk factors

1.
2.

Interactions between risk factors and ethnicity

1.
2.

Main findings

Risk findings analysis adjustments

Do the authors report an adjusted and/or an unadjusted analysis of risk per ethnic group?

1.
2.
3.
4.

Risk findings adjusted variables and method

Please describe for which variables has the risk findings analysis been adjusted for, and the method used (NA, if not applicable)

Risk findings

Was significant risk found or not for risk factors and groups included in the analysis? Distinguish adjusted and unadjusted findings if available. Extract for included groups. If the study includes groups not listed, please add relevant category to the data extraction sheet.

|                              | Black | South Asian | Caucasian/White | White Irish | African | Black Caribbean/African-Caribbean | Asian | African or Caribbean | Other | Unknown | Non-white | UK-born | Other White |
|------------------------------|-------|-------------|-----------------|-------------|---------|-----------------------------------|-------|----------------------|-------|---------|-----------|---------|-------------|
| less education adjusted      |       |             |                 |             |         |                                   |       |                      |       |         |           |         |             |
| hypertension adjusted        |       |             |                 |             |         |                                   |       |                      |       |         |           |         |             |
| hearing impairment adjusted  |       |             |                 |             |         |                                   |       |                      |       |         |           |         |             |
| smoking adjusted             |       |             |                 |             |         |                                   |       |                      |       |         |           |         |             |
| obesity adjusted             |       |             |                 |             |         |                                   |       |                      |       |         |           |         |             |
| depression adjusted          |       |             |                 |             |         |                                   |       |                      |       |         |           |         |             |
| physical inactivity adjusted |       |             |                 |             |         |                                   |       |                      |       |         |           |         |             |
| diabetes adjusted            |       |             |                 |             |         |                                   |       |                      |       |         |           |         |             |
| low social contact adjusted  |       |             |                 |             |         |                                   |       |                      |       |         |           |         |             |

|                                 | Black | South Asian | Caucasian/White | White Irish | African | Black Caribbean/African-Caribbean | Asian | African or Caribbean | Other | Unknown | Non-white | UK-born | Other White |
|---------------------------------|-------|-------------|-----------------|-------------|---------|-----------------------------------|-------|----------------------|-------|---------|-----------|---------|-------------|
| alcohol consumption adjusted    |       |             |                 |             |         |                                   |       |                      |       |         |           |         |             |
| traumatic brain injury adjusted |       |             |                 |             |         |                                   |       |                      |       |         |           |         |             |
| air pollution adjusted          |       |             |                 |             |         |                                   |       |                      |       |         |           |         |             |
| less education unadjusted       |       |             |                 |             |         |                                   |       |                      |       |         |           |         |             |
| hypertension unadjusted         |       |             |                 |             |         |                                   |       |                      |       |         |           |         |             |
| hearing impairment unadjusted   |       |             |                 |             |         |                                   |       |                      |       |         |           |         |             |
| smoking unadjusted              |       |             |                 |             |         |                                   |       |                      |       |         |           |         |             |
| obesity unadjusted              |       |             |                 |             |         |                                   |       |                      |       |         |           |         |             |
| depression unadjusted           |       |             |                 |             |         |                                   |       |                      |       |         |           |         |             |

|                                   | Black | South Asian | Caucasian/White | White Irish | African | Black Caribbean/African-Caribbean | Asian | African or Caribbean | Other | Unknown | Non-white | UK-born | Other White |
|-----------------------------------|-------|-------------|-----------------|-------------|---------|-----------------------------------|-------|----------------------|-------|---------|-----------|---------|-------------|
| physical activity unadjusted      |       |             |                 |             |         |                                   |       |                      |       |         |           |         |             |
| diabetes unadjusted               |       |             |                 |             |         |                                   |       |                      |       |         |           |         |             |
| low social contact unadjusted     |       |             |                 |             |         |                                   |       |                      |       |         |           |         |             |
| alcohol consumption unadjusted    |       |             |                 |             |         |                                   |       |                      |       |         |           |         |             |
| traumatic brain injury unadjusted |       |             |                 |             |         |                                   |       |                      |       |         |           |         |             |
| air pollution unadjusted          |       |             |                 |             |         |                                   |       |                      |       |         |           |         |             |

Missing data risk findings

Was there missing data in the risk factors analysis?

1. Yes
2. No
3. Not mentioned
4. No risk analysis per subgroup

% Missing data risk findings

If there is missing data in the analysis, which % is this? If there is no missing data or no risk analysis per subgroup, please write NA

Imputation risk findings

If there is missing data in the analysis, was imputation used? If there is no missing data/not mentioned please chose NA (not applicable)

1. Yes
2. No
3. No risk analysis per subgroup
4. NA

Interactions between 12 MDF

Please describe the main findings on interactions between risk factors whenever available. Distinguish adjusted and unadjusted findings if available.

|                     | Less education | Hypertension | Hearing impairment | Smoking | Obesity | Depression | Physical inactivity | Diabetes | Low social contact | Alcohol consumption | Traumatic brain injury |
|---------------------|----------------|--------------|--------------------|---------|---------|------------|---------------------|----------|--------------------|---------------------|------------------------|
| Less Education      |                |              |                    |         |         |            |                     |          |                    |                     |                        |
| Hypertension        |                |              |                    |         |         |            |                     |          |                    |                     |                        |
| Hearing impairment  |                |              |                    |         |         |            |                     |          |                    |                     |                        |
| Smoking             |                |              |                    |         |         |            |                     |          |                    |                     |                        |
| Obesity             |                |              |                    |         |         |            |                     |          |                    |                     |                        |
| Depression          |                |              |                    |         |         |            |                     |          |                    |                     |                        |
| Physical inactivity |                |              |                    |         |         |            |                     |          |                    |                     |                        |
| Diabetes            |                |              |                    |         |         |            |                     |          |                    |                     |                        |
| Low social contact  |                |              |                    |         |         |            |                     |          |                    |                     |                        |
| Alcohol             |                |              |                    |         |         |            |                     |          |                    |                     |                        |

|                        | Less education | Hypertension | Hearing impairment | Smoking | Obesity | Depression | Physical inactivity | Diabetes | Low social contact | Alcohol consumption | Traumatic brain injury |
|------------------------|----------------|--------------|--------------------|---------|---------|------------|---------------------|----------|--------------------|---------------------|------------------------|
| consumption            |                |              |                    |         |         |            |                     |          |                    |                     |                        |
| Traumatic brain injury |                |              |                    |         |         |            |                     |          |                    |                     |                        |
| Air pollution          |                |              |                    |         |         |            |                     |          |                    |                     |                        |

Interactions between 12 MDF and other risk factors

If there is an analysis of interactions between the 12 MRF or the other risk factors mentioned above (sleep, diet, housing, sound pollution, low income, deprivation, racism/discrimination, visual impairment, smelling impairment), please specify.  
If not, please write NA (Not applicable)

Risk factors x ethnicity adjustments

Do the authors report an adjusted and/or an unadjusted analysis of risk factors interaction with ethnicity?

1.
2.
3.
4.

Risk factor x ethnicity adjusted variables and method

Please describe for which variables has the risk factor x ethnicity analysis been adjusted for, and the method used (NA, if not applicable)

Interaction risk factors and ethnicity

If there is an analysis of interactions between risk factors and ethnicity please specify which and its main findings.  
If not, please write NA (Not applicable)

Missing data risk factors x ethnicity

Was there missing data in the risk factors x ethnicity analysis?

1.
2.
3.
4.

% Missing data risk factors x ethnicity

If there is missing data in the analysis, which % is this? If there is no missing data or no risk factors x ethnicity analysis, please write NA

Imputations risk factors x ethnicity

If there is missing data in the analysis, was imputation used? If there is no missing data/not mentioned please chose NA (not applicable)

1. Yes
2. No
3. No analysis of risk factors x ethnicity
4. NA
