# Supplementary material
Source: HighWire-hosted journal article supplement (https://jech.bmj.com/content/jech-2024-222654)
Supplement: inline-supplementary-material-5 [file inline-supplementary-material-5.pdf]

Supplementary material for Jordão, M., Gong, L., Andre, D., Akhtar, A., Nwofe, E., Hawkins, R., Best, K., Parveen, S., Windle, K., & Clegg, A. Minoritised ethnic groups and modifiable dementia risk: a scoping review of UK-based evidence

**Supplement 5.** Representation of 12 MRF and minoritised ethnic groups in the included studies. Ethnic labels as in included studies. For ● findings for risk factors by subgroup are reported; for × subgroups and/or risk factors are included in the sample/data, but no subgroup findings are reported.

|                        | African or Caribbean | Asian | Black | Black African | Black/African-Caribbean | Middle Eastern | Mixed | Non-white | Other | Other white | South Asian | UK-born | Unknown | White Irish |
|------------------------|----------------------|-------|-------|---------------|-------------------------|----------------|-------|-----------|-------|-------------|-------------|---------|---------|-------------|
| Less education         |                      | ●     | ●●×   |               | ●●×                     |                |       |           |       |             | ●×          |         |         |             |
| Hypertension           | ●                    | ●     | ●●●●× |               | ●●●×                    |                |       | ×         | ×     |             | ●●●×        | ×       | ×       |             |
| Hearing impairment     |                      | ●×    | ●●×   | ×             | ×                       | ×              | ×     |           | ×     |             | ●×          |         | ×       |             |
| Smoking                | ×                    | ●     | ●●×   |               | ●×                      |                |       |           | ×     |             | ●×          | ×       | ×       |             |
| Obesity                |                      | ●     | ●●●×  |               | ●×                      |                |       |           | ×     |             | ●●×         |         | ×       |             |
| Depression             |                      | ●×    | ●●×   | ×             | ●×                      | ×              | ×     |           | ×     | ×           | ●×          |         | ×       | ×           |
| Physical inactivity    |                      | ●     | ●●    |               | ●●                      |                |       |           |       |             | ●           |         |         |             |
| Diabetes               | ×                    | ●     | ●●●●× |               | ●●●×                    |                |       | ●         | ×     |             | ●●●×        | ×       | ×       |             |
| Low social contact     |                      | ●     | ●●    |               |                         |                |       |           |       |             | ●           |         |         |             |
| Alcohol consumption    | ×                    | ●     | ●●×   |               | ●×                      |                |       |           | ×     |             | ●×          | ×       | ×       |             |
| Traumatic brain injury |                      | ×     | ●×    |               |                         |                |       |           | ×     |             | ×           |         | ×       |             |
| Air pollution          |                      | ●     | ●●    |               |                         |                |       |           |       |             | ●           |         |         |             |
